# Supplementary material for: Effect of prenatal administration of low dose antibiotics on gut microbiota and body fat composition of newborn mice
Source: PubMed Central journal article supplement (PMC5874232; doi:10.3164/jcbn.17-53), 2017-12-29
Supplement: jcbn17-53sf02.pdf [file jcbn17-53sf02.pdf]

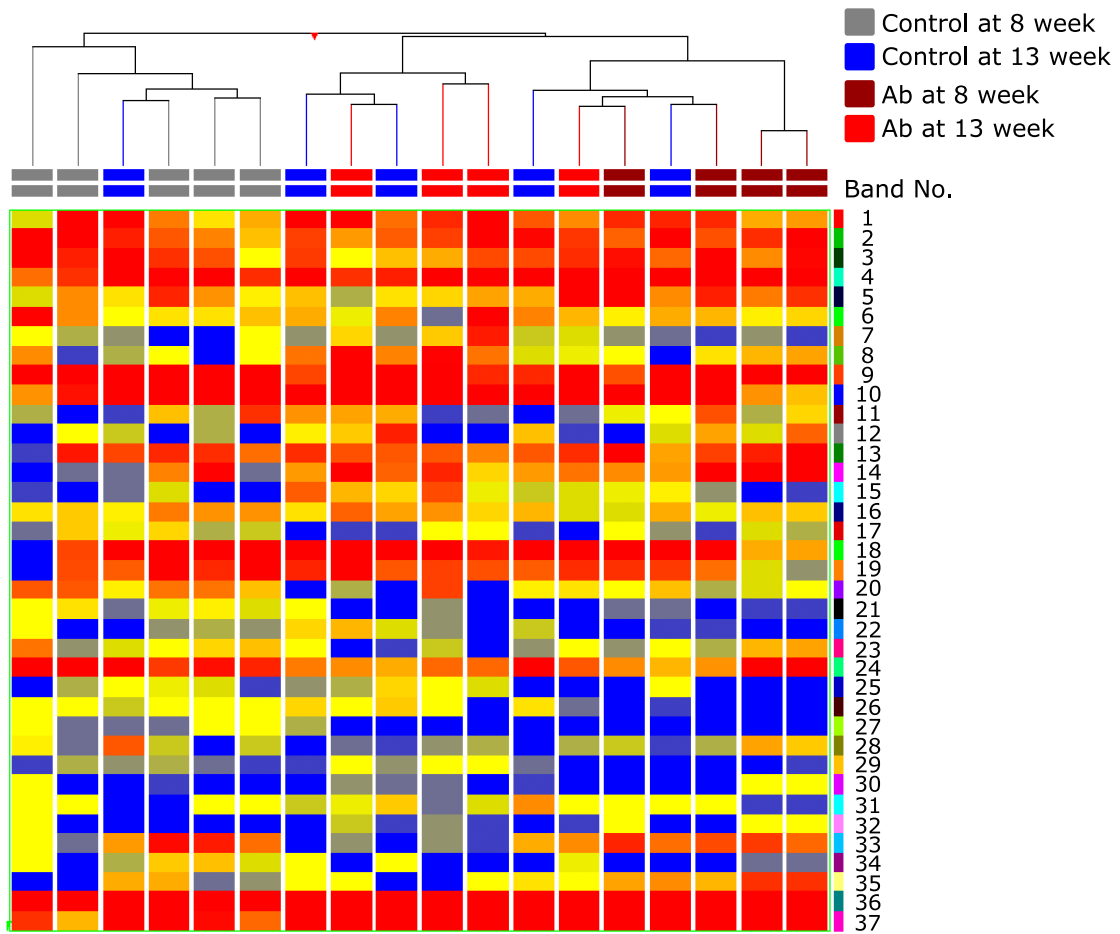

**Supplemental Fig. 2.** Hierarchical clustering of the gut microbiota of the pups. Hierarchical clustering of the DGGE band pattern the pups at 8 and 13 weeks. Control group ( $n = 5$ ); Antibiotics group (Ab,  $n = 4$ ).
